# Supplementary material for: Validation of a MS Based Proteomics Method for Milk and Egg Quantification in Cookies at the Lowest VITAL Levels: An Alternative to the Use of Precautionary Labeling
Source: PubMed Central journal article supplement (PMC7603226; doi:10.3390/foods9101489), 2020-10-19
Supplement: foods-09-01489-s001.pdf [file foods-09-01489-s001.pdf]

## Supporting Information

Table S1. Chromatographic conditions for milk and egg marker peptides separations.

|                                          |                                                                              |           |           |
|------------------------------------------|------------------------------------------------------------------------------|-----------|-----------|
| <b>Column</b>                            | Perkin Elmer Aqueous C18 Column (2.1 x 150 mm; 3 $\mu$ m; 100 $\text{\AA}$ ) |           |           |
| <b>Mobile phase</b>                      | Solvent A: H <sub>2</sub> O + 0.1% Formic acid                               |           |           |
|                                          | Solvent B: Acetonitrile + 0.1% Formic acid                                   |           |           |
|                                          | <b>Time (min)</b>                                                            | <b>%A</b> | <b>%B</b> |
|                                          | 0                                                                            | 90        | 10        |
|                                          | 17                                                                           | 50        | 50        |
|                                          | 17.2                                                                         | 10        | 90        |
|                                          | 27                                                                           | 10        | 90        |
|                                          | 27.2                                                                         | 90        | 10        |
| 44                                       | 90                                                                           | 10        |           |
| <b>Oven Temperature:</b> 30 $^{\circ}$ C |                                                                              |           |           |
| <b>Flow:</b> 200 $\mu$ L/mL              |                                                                              |           |           |
| <b>Injection volume:</b> 10 $\mu$ L      |                                                                              |           |           |

Table S2. SRM conditions for the simultaneous detection of milk and egg marker peptides by QSight platform.

| Protein                | Peptide sequence         | Precursor ion/charge | Retention time (min) | Acquisition Window (min) | Transition (m/z)                       | EV | CC L2 | CE  |
|------------------------|--------------------------|----------------------|----------------------|--------------------------|----------------------------------------|----|-------|-----|
| $\alpha$ S1-casein     | FFVAPFPEVFGK (FFV)       | 693.1 (+2)           | 13.1 $\pm$ 0.02      | 12.59-13.59              | 920.3 (y <sub>8</sub> <sup>+</sup> )   | 15 | -168  | -26 |
|                        |                          |                      |                      |                          | 991.4 (y <sub>9</sub> <sup>+</sup> )   | 17 | -168  | -26 |
|                        |                          |                      |                      |                          | 1090.4 (y <sub>10</sub> <sup>+</sup> ) | 25 | -172  | 26  |
|                        | YLGYLEQLLR (YLG)         | 634.6 (+2)           | 12.5 $\pm$ 0.01      | 11.98-12.98              | 658.2 (y <sub>5</sub> <sup>+</sup> )   | 31 | -124  | -28 |
|                        |                          |                      |                      |                          | 771.3 (y <sub>6</sub> <sup>+</sup> )   | 23 | -152  | -28 |
|                        |                          |                      |                      |                          | 991.4 (y <sub>8</sub> <sup>+</sup> )   | 24 | -140  | -27 |
| $\beta$ -Lactoglobulin | TPEVDDEALEK (TPE)        | 623.2 (+2)           | 5.8 $\pm$ 0.01       | 5.31-6.31                | 572.5 (y <sub>10</sub> <sup>2+</sup> ) | 35 | -192  | -29 |
|                        |                          |                      |                      |                          | 1047 (y <sub>9</sub> <sup>+</sup> )    | 45 | -170  | 30  |
|                        |                          |                      |                      |                          | 819.1 (y <sub>7</sub> <sup>+</sup> )   | 41 | -196  | -29 |
|                        | VLVLDTDYK (VLV)          | 533.2 (+2)           | 8.3 $\pm$ 0.01       | 7.82-8.82                | 853 (y <sub>7</sub> <sup>+</sup> )     | 22 | -100  | -22 |
|                        |                          |                      |                      |                          | 640.8 (y <sub>5</sub> <sup>+</sup> )   | 24 | -108  | -24 |
|                        |                          |                      |                      |                          | 753.9 (y <sub>6</sub> <sup>+</sup> )   | 18 | -100  | -22 |
| Vitellogenin-2         | NIPFAEYPTYK (NIP)        | 671.6 (+2)           | 9.1 $\pm$ 0.01       | 8.65-9.66                | 557.9 (y <sub>9</sub> <sup>2+</sup> )  | 25 | -140  | -25 |
|                        |                          |                      |                      |                          | 507.9 (y <sub>4</sub> <sup>+</sup> )   | 33 | -180  | -39 |
|                        |                          |                      |                      |                          | 1114.9 (y <sub>9</sub> <sup>+</sup> )  | 25 | -132  | -23 |
|                        | NIGELGVEK (NIG)          | 479.7 (+2)           | 6.5 $\pm$ 0.01       | 6.01-7.01                | 673.9 (y <sub>6</sub> <sup>+</sup> )   | 27 | -120  | -21 |
|                        |                          |                      |                      |                          | 228.0 (b <sub>2</sub> <sup>+</sup> )   | 24 | -88   | -18 |
|                        |                          |                      |                      |                          | 544.8 (y <sub>5</sub> <sup>+</sup> )   | 27 | -124  | -24 |
| Ovalbumin              | ISQAVHAAHAEINEA GR (ISQ) | 592.1 (+3)           | 4.3 $\pm$ 0.01       | 3.80-4.80                | 778.5 (y <sub>7</sub> <sup>+</sup> )   | 42 | -128  | -31 |
|                        |                          |                      |                      |                          | 858.9 (y <sub>8</sub> <sup>+</sup> )   | 30 | -204  | -29 |
|                        |                          |                      |                      |                          | 545.9 (y <sub>5</sub> <sup>+</sup> )   | 20 | -200  | -40 |
|                        | GGLEPINFQTAADQA R (GGL)  | 844.7 (+2)           | 8.9 $\pm$ 0.01       | 8.44-9.45                | 1007.4 (y <sub>9</sub> <sup>+</sup> )  | 50 | -272  | -51 |
|                        |                          |                      |                      |                          | 1331.6 (y <sub>12</sub> <sup>+</sup> ) | 29 | -336  | -35 |
|                        |                          |                      |                      |                          | 1121.2 (y <sub>10</sub> <sup>+</sup> ) | 38 | -380  | -40 |

Table S3. Recovery table estimated with the aid of MoniQA reference materials incurred at low (3.54  $\mu\text{g}_{\text{tot prot}}/\text{g}_{\text{matrix}}$ ) and high (17.7  $\mu\text{g}_{\text{tot prot}}/\text{g}_{\text{matrix}}$ ) levels with milk ingredient.

| Peptide/transition        | LOW-MQA 102016 incurred material |                         |              | HIGH-MQA 082016 incurred material |                         |              |
|---------------------------|----------------------------------|-------------------------|--------------|-----------------------------------|-------------------------|--------------|
|                           | Measured concentration           | Validated concentration | Recovery     | Measured concentration            | Validated concentration | Recovery     |
| 634.4 $\rightarrow$ 991.4 | 2,0 $\pm$ 0,2                    | 3,54                    | 57 $\pm$ 6 % | 10,0 $\pm$ 1,3                    | 17,7                    | 56 $\pm$ 7 % |
| 692.9 $\rightarrow$ 991.4 | 2,0 $\pm$ 0,2                    | 3,54                    | 57 $\pm$ 4 % | 8,9 $\pm$ 0,5                     | 17,7                    | 50 $\pm$ 2 % |

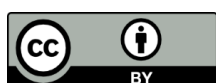

© 2020 by the authors. Licensee MDPI, Basel, Switzerland. This article is an open access article distributed under the terms and conditions of the Creative Commons Attribution (CC BY) license (<http://creativecommons.org/licenses/by/4.0/>).
